# Supplementary material
Source: JCI journal article supplement (doi:10.1172/jci198045)
Supplement: sd1 [file 1]

1 **Supplemental material**

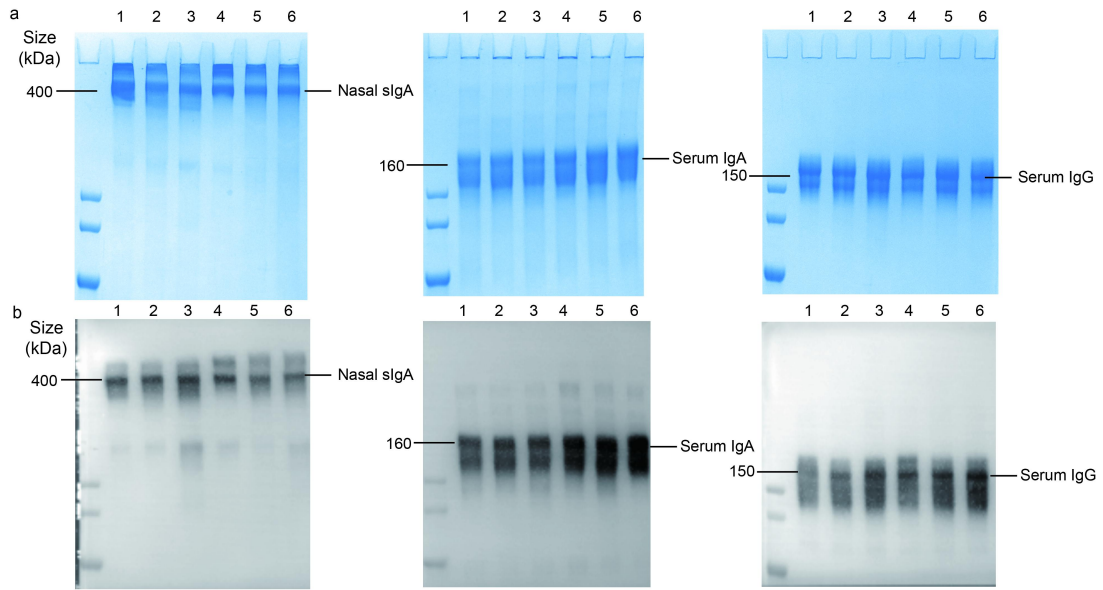

2

3 **Supplementary Figure S1. SDS-PAGE and Western blot analysis of purified nasal sIgA,**  
4 **serum IgA, and serum IgG from six donors after intranasal booster.**

5 a-b. Paired nasal sIgA, serum IgA, and serum IgG were purified from the same donors using  
6 affinity chromatography. Purified antibody samples were analyzed by non-reducing  
7 SDS-PAGE and Western blot. Anti-human IgA  $\alpha$ -heavy chain (HC $\alpha$ ) antibody and anti-human  
8 IgG H+L antibody were used for detecting IgA and IgG, respectively.

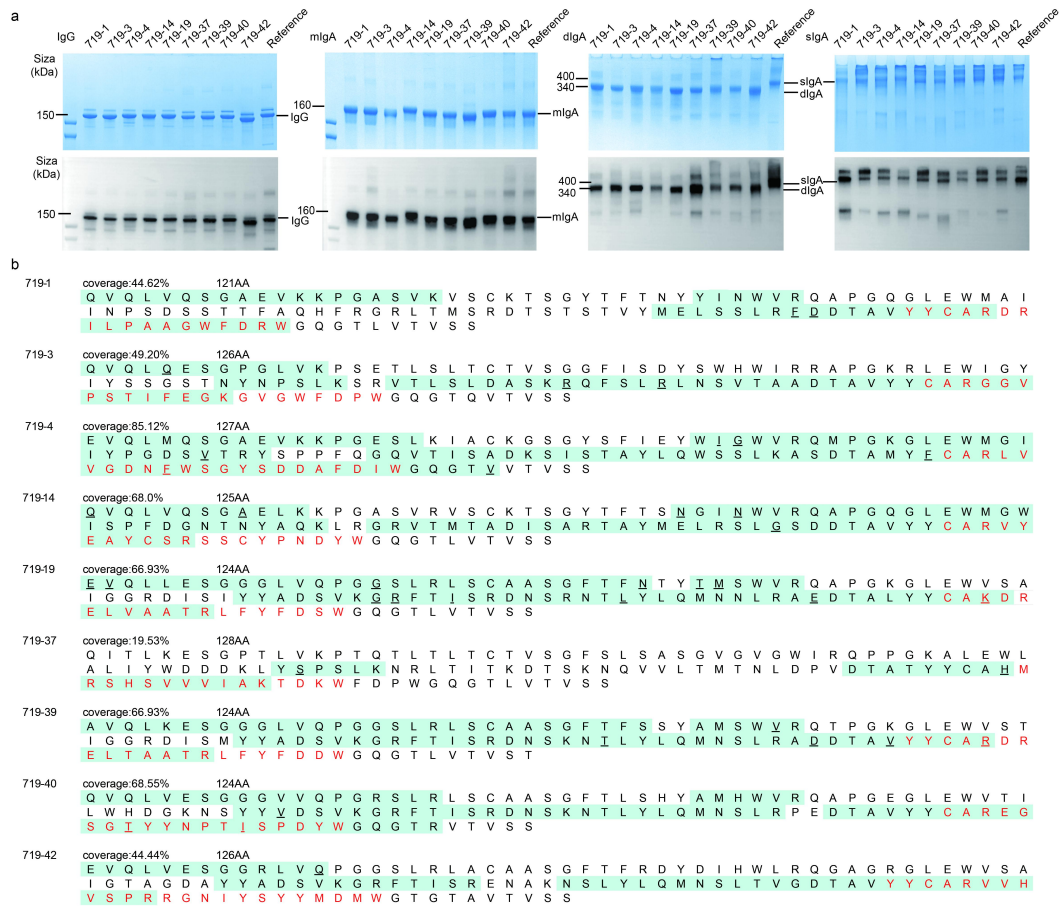

9

10 **Supplementary Figure S2. The identification and expression of nasal mucosal mAbs.**

11 a. Expression and purification of mAbs 719-1, 719-3, 719-4, 719-14, 719-19, 719-37, 719-39,  
 12 719-40, and 719-42 in IgG, mIgA, dIgA, and sIgA forms. The purity and molecular weight of  
 13 each antibody were analyzed by non-reducing SDS-PAGE and Western blot.

14 b. Liquid chromatography-tandem mass spectrometry-detected peptides matching the heavy  
 15 chain VJ gene and CDR3 sequences are highlighted in green, and CDR3 regions are marked  
 16 in red.

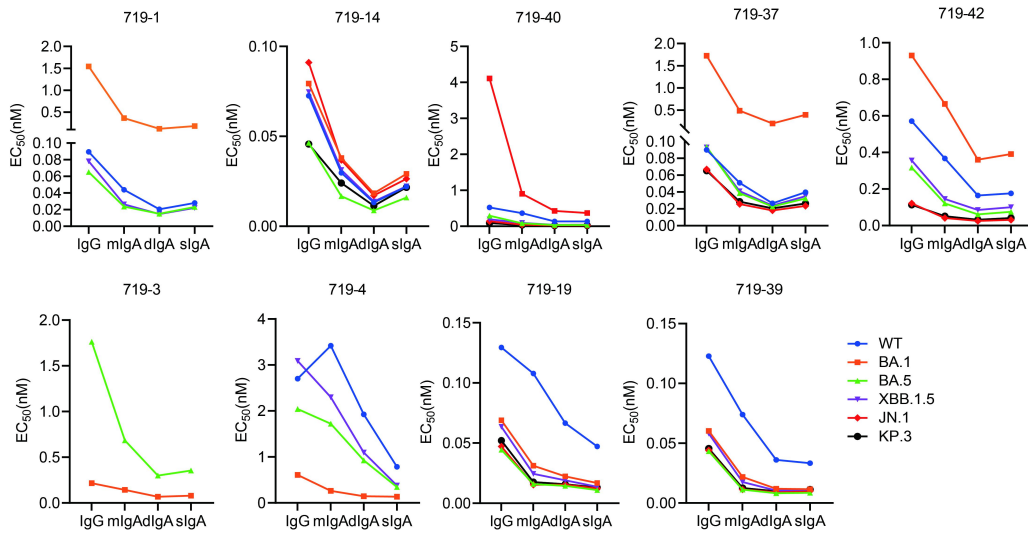

17

18 **Supplementary Figure S3. The spike binding activities of nasal mucosal mAbs in IgG,**  
 19 **mIgA, dIgA, and sIgA forms.**

20 The binding activities of mAbs for the spike proteins of WT, BA.1, BA.5, XBB.1.5, JN.1, and  
 21 KP.3 were measured by ELISA. The data are presented as half-maximal effective  
 22 concentrations (EC<sub>50</sub>).

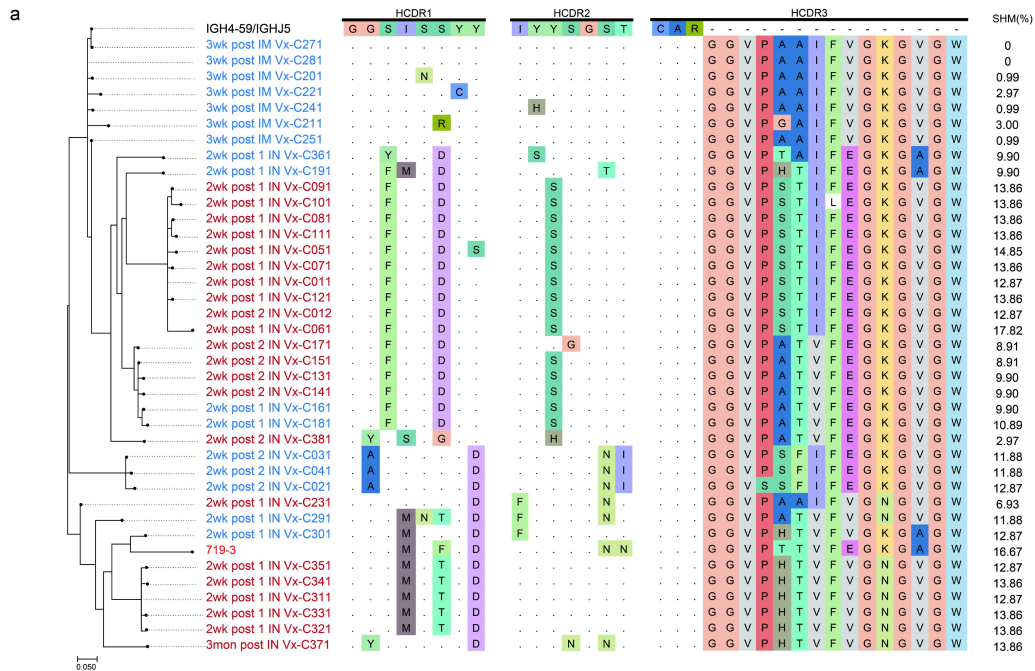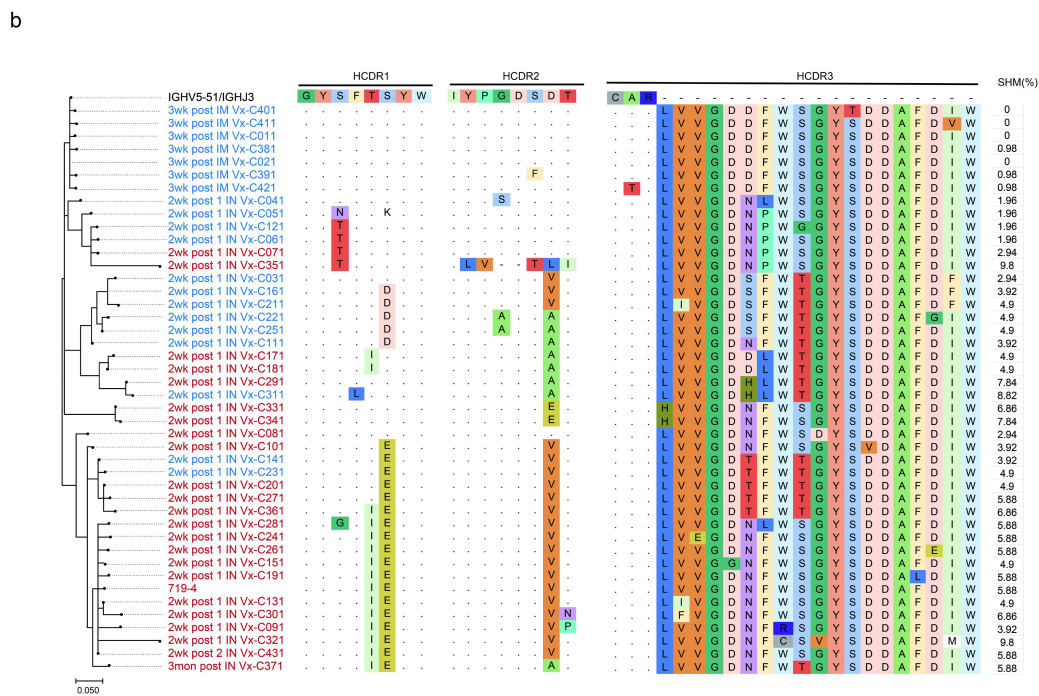

23

24 **Supplementary Figure S4. Genealogical tree of 719-3 and 719-4 -like antibodies.**

25 **a.** Genealogical tree of 719-3-like sequences descending from germline gene IGHV4-59/J5  
 26 for representative antibody clusters in the BCR repertoires at different time points after  
 27 vaccination. Maximum-likelihood (ML) tree (left panel), multiple alignments of amino acid  
 28 sequences (middle panel), and somatic hypermutation rates of each sequence (right panel) are  
 29 shown. The antibody isotypes are color-coded: IgA is red, and IgG is blue.

30 **b.** Genealogical tree of 719-4-like sequences descending from germline gene IGHV5-51/J3  
31 for representative antibody clusters in the BCR repertoires at different time points after  
32 vaccination. Maximum-likelihood (ML) tree (left panel), multiple alignments of amino acid  
33 sequences (middle panel), and somatic hypermutation rates of each sequence (right panel) are  
34 shown. The antibody isotypes are color-coded as IgA in red and IgG in blue.

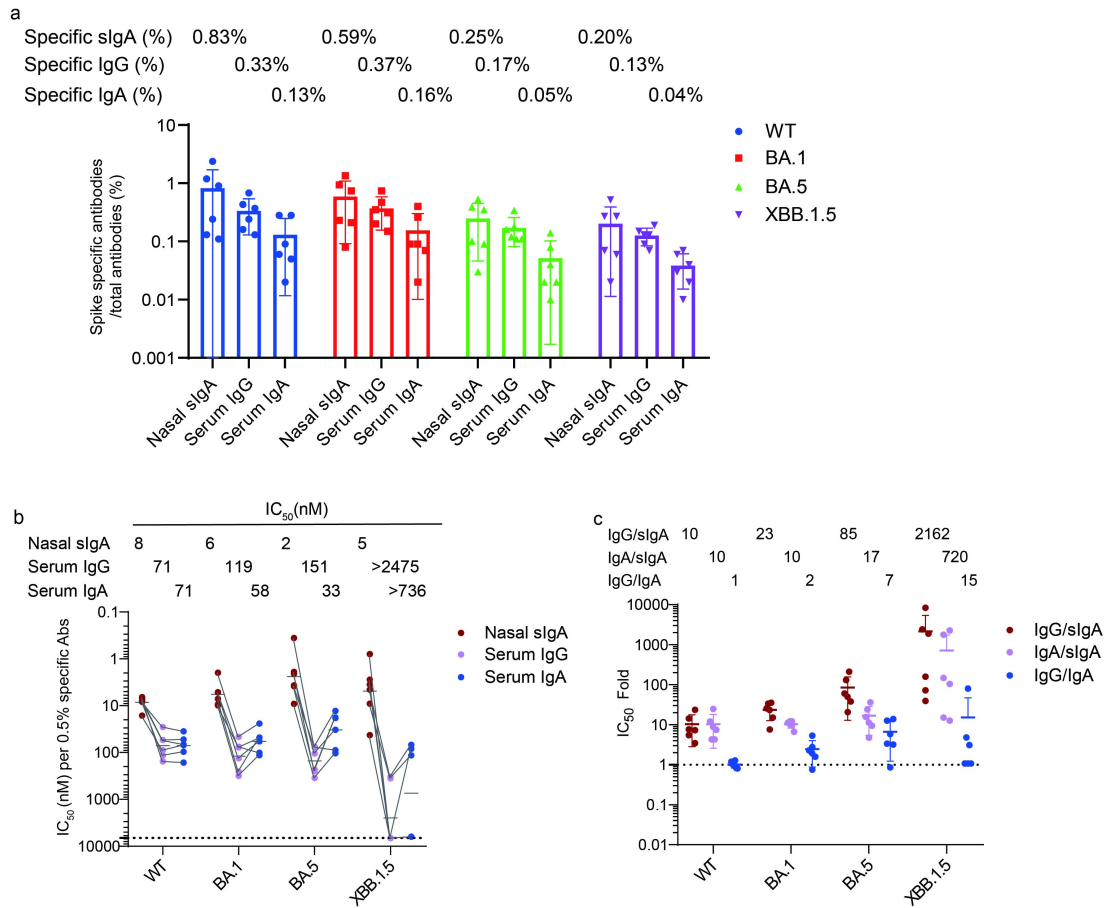

35

36 **Supplementary Figure S5. Neutralization activity of nasal sIgA, serum IgA, and serum**  
 37 **IgG after normalization to 0.5% spike-specific antibodies.**

38 a. Estimation of spike-specific antibody proportions. The percentage of WT, BA.1, BA.5, and  
 39 XBB.1.5 spike-specific antibodies within total nasal sIgA, serum IgG, and serum IgA was  
 40 measured by ELISA, using mAb 719-1 (in the corresponding isotype) as a reference standard.  
 41 Data are shown as mean  $\pm$  SD (n = 6).

42 b. Neutralizing activity of nasal sIgA, serum IgA, and serum IgG after normalizing all  
 43 samples to contain 0.5% spike-specific antibodies was assessed using a lentivirus-based  
 44 pseudovirus system. The results are presented as 50% inhibitory concentration (IC<sub>50</sub>) in nM.  
 45 Samples showing no detectable neutralization activity at the highest concentration (1000  
 46  $\mu$ g/mL) were assigned an IC<sub>50</sub> value of 6666.7 nM (dashed line), representing no  
 47 neutralization. Geomean values (n=6) are reported above the graph.

48 c. The ratios of IC<sub>50</sub> between paired IgG/sIgA, IgA/sIgA, and IgG/IgA for each donor are  
 49 presented. Mean values (n=6) are reported above the graph.

50 **Supplementary Table S1. Demographics and vaccine regimens of the study cohort**

| Donor ID | Age (year) | Gender | Vaccine dose #1                                           | Vaccine dose #2                                           | Manufacturer   | Vaccine dose                                 | Vaccine dose                                 | Manufacturer | Sample collection time (days post intranasal vaccination) |
|----------|------------|--------|-----------------------------------------------------------|-----------------------------------------------------------|----------------|----------------------------------------------|----------------------------------------------|--------------|-----------------------------------------------------------|
|          |            |        | Date (Intramuscular vaccination with inactivated vaccine) | Date (Intramuscular vaccination with inactivated vaccine) |                | #3 Date (Intranasal vaccination with NB2155) | #4 Date (Intranasal vaccination with NB2155) |              |                                                           |
| 1        | 60         | Male   | 8-Jul-2021                                                | 13-Aug-2021                                               | SinovacBiotech | 16-Mar-2022                                  | 27-Apr-2022                                  | nBiomed      | 27                                                        |
| 2        | 43         | Female | 31-Jul-2021                                               | 29-Aug-2021                                               | Sinopharm      | 22-Nov-2022                                  | 22-Dec-2022                                  | nBiomed      | 39                                                        |
| 3        | 26         | Male   | 7-Apr-2021                                                | 25-May-2021                                               | SinovacBiotech | 25-Nov-2022                                  | 28-Dec-2022                                  | nBiomed      | 31                                                        |
| 4        | 27         | Female | 13-Mar-2021                                               | 13-Apr-2021                                               | SinovacBiotech | 8-Dec-2022                                   | 15-Jan-2023                                  | nBiomed      | 20                                                        |
| 5        | 26         | Male   | 12-Mar-2021                                               | 7-Apr-2021                                                | SinovacBiotech | 8-Dec-2022                                   | 15-Jan-2023                                  | nBiomed      | 20                                                        |
| 6        | 25         | Female | 19-May-2021                                               | 10-Jun-2021                                               | Sinopharm      | 8-Dec-2022                                   | 15-Jan-2023                                  | nBiomed      | 20                                                        |

51

52 **Supplementary Table S2. Pseudovirus neutralization and binding activities of serum**  
 53 **IgG, serum IgA, and nasal sIgA from six donors against Omicron subvariants BA.1,**  
 54 **BA.5, XBB.1.5 and pre-Omicron WT**

| IC <sub>50</sub> (nM) |             |         |         |         |         |         |         |         |
|-----------------------|-------------|---------|---------|---------|---------|---------|---------|---------|
| Serum IgG             | Pseudovirus | 1       | 2       | 3       | 4       | 5       | 6       | Geomean |
|                       | WT          | 113.74  | 154.45  | 171.28  | 220.19  | 58.81   | 102.02  | 125.86  |
|                       | BA.1        | 212.15  | 213.14  | 855.67  | 195.02  | 65.58   | 80.14   | 184.66  |
|                       | BA.5        | 512.64  | 421.50  | 1056.75 | 1138.06 | 228.16  | 212.55  | 482.40  |
|                       | XBB.1.5     | 6666.67 | 6666.67 | 6666.67 | 1871.49 | 6666.67 | 1188.10 | 4046.81 |
| Serum IgA             | Pseudovirus | 1       | 2       | 3       | 4       | 5       | 6       | Geomean |
|                       | WT          | 286.01  | 785.06  | 1441.22 | 652.70  | 61.81   | 404.98  | 417.39  |
|                       | BA.1        | 214.99  | 403.55  | 978.52  | 285.53  | 30.19   | 531.89  | 270.21  |
|                       | BA.5        | 630.89  | 716.09  | 968.48  | 367.70  | 45.27   | 1161.88 | 451.42  |
|                       | XBB.1.5     | 6666.67 | 6666.67 | 6666.67 | 1368.22 | 624.76  | 1623.81 | 2727.02 |
| Nasal sIgA            | Pseudovirus | 1       | 2       | 3       | 4       | 5       | 6       | Geomean |
|                       | WT          | 2.85    | 38.58   | 15.17   | 29.39   | 4.72    | 3.52    | 9.66    |
|                       | BA.1        | 5.18    | 33.04   | 17.51   | 11.70   | 1.38    | 3.82    | 7.55    |
|                       | BA.5        | 13.74   | 32.96   | 20.15   | 11.04   | 0.47    | 3.57    | 7.43    |
|                       | XBB.1.5     | 80.88   | 74.34   | 32.08   | 33.76   | 1.55    | 9.04    | 21.21   |
| EC <sub>50</sub> (nM) |             |         |         |         |         |         |         |         |
| Serum IgG             | Spike       | 1       | 2       | 3       | 4       | 5       | 6       | Geomean |
|                       | WT          | 83.40   | 51.88   | 143.47  | 166.47  | 34.99   | 16.40   | 62.45   |
|                       | BA.1        | 415.27  | 87.87   | 317.93  | 172.33  | 96.93   | 71.07   | 154.82  |
|                       | BA.5        | 154.00  | 182.33  | 183.07  | 53.68   | 24.33   | 17.51   | 69.99   |
|                       | XBB.1.5     | 208.27  | 181.07  | 746.00  | 154.73  | 24.29   | 15.95   | 109.10  |
| Serum IgA             | Spike       | 1       | 2       | 3       | 4       | 5       | 6       | Geomean |
|                       | WT          | 176.00  | 311.13  | 1785.00 | 337.13  | 40.53   | 159.63  | 244.42  |
|                       | BA.1        | 409.13  | 430.81  | 1135.00 | 429.56  | 148.00  | 700.00  | 455.25  |
|                       | BA.5        | 291.19  | 216.88  | 506.94  | 189.44  | 34.36   | 119.13  | 170.80  |
|                       | XBB.1.5     | 1249.38 | 1318.13 | 1965.00 | 596.25  | 51.36   | 103.50  | 466.12  |
| Nasal sIgA            | Spike       | 1       | 2       | 3       | 4       | 5       | 6       | Geomean |
|                       | WT          | 2.73    | 9.31    | 11.39   | 12.79   | 4.71    | 3.02    | 6.12    |
|                       | BA.1        | 5.86    | 12.29   | 9.55    | 8.52    | 1.34    | 3.50    | 5.49    |
|                       | BA.5        | 3.47    | 19.30   | 16.05   | 9.12    | 3.37    | 2.64    | 6.66    |
|                       | XBB.1.5     | 6.37    | 24.50   | 40.36   | 26.47   | 4.35    | 3.66    | 11.77   |

55

**Supplementary Table S3. The IC<sub>50</sub> ratios and EC<sub>50</sub> ratios of serum IgG to nasal sIgA, serum IgA to nasal sIgA, and serum IgG to serum IgA for each donor**

| IC <sub>50</sub> Fold |         | 1      | 2     | 3      | 4      | 5       | 6      | Mean   |
|-----------------------|---------|--------|-------|--------|--------|---------|--------|--------|
| serum IgG/nasal sIgA  | WT      | 39.95  | 4.00  | 11.29  | 7.49   | 12.47   | 28.95  | 17.36  |
|                       | BA.1    | 40.92  | 6.45  | 48.87  | 16.67  | 47.42   | 20.98  | 30.22  |
|                       | BA.5    | 37.30  | 12.79 | 52.45  | 103.08 | 486.66  | 59.54  | 125.30 |
|                       | XBB.1.5 | 82.42  | 89.68 | 207.79 | 55.43  | 4310.07 | 131.39 | 812.80 |
| IC <sub>50</sub> Fold |         | 1      | 2     | 3      | 4      | 5       | 6      | Mean   |
| serum IgA/nasal sIgA  | WT      | 100.46 | 20.35 | 94.98  | 22.21  | 13.10   | 114.90 | 61.00  |
|                       | BA.1    | 41.47  | 12.21 | 55.89  | 24.40  | 21.83   | 139.22 | 49.17  |
|                       | BA.5    | 45.91  | 21.73 | 48.07  | 33.30  | 96.56   | 325.45 | 95.17  |
|                       | XBB.1.5 | 82.42  | 89.68 | 207.79 | 40.52  | 403.92  | 179.57 | 167.32 |
| IC <sub>50</sub> Fold |         | 1      | 2     | 3      | 4      | 5       | 6      | Mean   |
| serum IgG/serum IgA   | WT      | 0.40   | 0.20  | 0.12   | 0.34   | 0.95    | 0.25   | 0.38   |
|                       | BA.1    | 0.99   | 0.53  | 0.87   | 0.68   | 2.17    | 0.15   | 0.90   |
|                       | BA.5    | 0.81   | 0.59  | 1.09   | 3.10   | 5.04    | 0.18   | 1.80   |
|                       | XBB.1.5 | 1.00   | 1.00  | 1.00   | 1.37   | 10.67   | 0.73   | 2.63   |
| EC <sub>50</sub> Fold |         | 1      | 2     | 3      | 4      | 5       | 6      | Mean   |
| serum IgG/nasal sIgA  | WT      | 30.55  | 5.57  | 12.60  | 13.02  | 7.43    | 5.43   | 12.43  |
|                       | BA.1    | 70.87  | 7.15  | 33.29  | 20.23  | 72.34   | 20.31  | 37.36  |
|                       | BA.5    | 44.38  | 9.45  | 11.41  | 5.89   | 7.22    | 6.63   | 14.16  |
|                       | XBB.1.5 | 32.70  | 7.39  | 18.48  | 5.85   | 5.58    | 4.36   | 12.39  |
| EC <sub>50</sub> Fold |         | 1      | 2     | 3      | 4      | 5       | 6      | Mean   |
| serum IgA/nasal sIgA  | WT      | 64.47  | 33.42 | 156.72 | 26.36  | 8.61    | 52.86  | 57.07  |
|                       | BA.1    | 69.82  | 35.05 | 118.85 | 50.42  | 110.45  | 200.00 | 97.43  |
|                       | BA.5    | 83.92  | 11.24 | 31.59  | 20.77  | 10.20   | 45.13  | 33.81  |
|                       | XBB.1.5 | 196.14 | 53.80 | 48.69  | 22.53  | 11.81   | 28.28  | 60.21  |
| EC <sub>50</sub> Fold |         | 1      | 2     | 3      | 4      | 5       | 6      | Mean   |
| serum IgG/serum IgA   | WT      | 0.47   | 0.17  | 0.08   | 0.49   | 0.86    | 0.10   | 0.36   |
|                       | BA.1    | 1.02   | 0.20  | 0.28   | 0.40   | 0.65    | 0.10   | 0.44   |
|                       | BA.5    | 0.53   | 0.84  | 0.36   | 0.28   | 0.71    | 0.15   | 0.48   |
|                       | XBB.1.5 | 0.17   | 0.14  | 0.38   | 0.26   | 0.47    | 0.15   | 0.26   |

57 **Supplementary Table S4. Collection time of PBMC samples from Donor 1 for 5'**  
 58 **scRNA-seq & scV(D)J-seq(BCR)**

| Donor ID | Vaccination date<br>(Intranasal booster with NB2155) | Manufacturer | PBMC collection date | Sample name      | B cell types         | Name    | 5' scRNA-seq | scV(D)J-seq(BCR) |
|----------|------------------------------------------------------|--------------|----------------------|------------------|----------------------|---------|--------------|------------------|
| Donor 1  | 16-Mar-22                                            | nBiomed      | 26-Mar-22            | 10d post 1 IN Vx | CD138 <sup>+</sup> B | 46383#1 | 7569         | 1533             |
|          |                                                      | nBiomed      |                      |                  | CD27 <sup>+</sup> B  | 46383#2 | 8713         | 4145             |
|          |                                                      | nBiomed      | 19-Apr-22            | 30d post 1 IN Vx | CD27 <sup>+</sup> B  | 46383#3 | 8210         | 6334             |
|          | 27-Apr-22                                            | nBiomed      | 27-May-22            | 30d post 2 IN Vx | IgG <sup>+</sup> B   | 46383#4 | 4243         | 3330             |
|          |                                                      | nBiomed      |                      |                  | CD27 <sup>+</sup> B  | 46383#5 | 3965         | 2677             |
|          | 28-Jul-22                                            | nBiomed      | 4-Aug-22             | 7d post 3 IN Vx  | CD138 <sup>+</sup> B | 46383#6 | 1157         | 864              |
|          |                                                      | nBiomed      | 5-Dec-22             | 4m post 3 IN Vx  | CD27 <sup>+</sup> B  | 46383#7 | 4010         | 3277             |
|          | 8-May-24                                             | nBiomed      | 15-May-24            | 7d post 4 IN Vx  | CD19 <sup>+</sup> B  | 46383#8 | 12875        | 10015            |
|          |                                                      | nBiomed      | 22-May-24            | 14d post 4 IN Vx | CD27 <sup>+</sup> B  | 46383#9 | 8383         | 1500             |

59

60

61

62

63

64

65

66

67

68

69

70

71

72

73

74 **Supplementary Table S5. Germline genes, CDR3 sequences (CDR3-H and CDR3-L),**  
75 **binding activities to BA.1/BA.5 spike proteins, and epitopes of 45 mAbs**

| Name   | V_gene_H | CDR3_H                   | V_gene_L  | CDR3_L         | BA.1 EC <sub>50</sub> (nM) | BA.5 EC <sub>50</sub> (nM) | Epitope |
|--------|----------|--------------------------|-----------|----------------|----------------------------|----------------------------|---------|
| 719-1  | IGHV1-46 | CARDRILPAAGWFDRW         | IGLV3-21  | CQVWDGSSDRYYVF | 1.54                       | 0.07                       | RBD     |
| 719-3  | IGHV4-59 | CARGGVPTTVFEGKGAGWFDPW   | IGKV3-15  | CQQYENWPGTF    | 0.22                       | 1.76                       | NTD     |
| 719-4  | IGHV5-51 | CARLVVGDNFWSGYSDDAFDIW   | IGLV1-47  | CAAWDDTLNGVVF  | 0.61                       | 2.04                       | NTD     |
| 719-5  | IGHV3-53 | CARDVLVRGVPPYFDYW        | IGKV1-39  | CQQSYSTPALTF   | 465.9                      | 186.4                      | RBD     |
| 719-6  | IGHV4-39 | CARLSGYPDRFDYW           | IGLV2-23  | CCSYAGSSTYVF   | 1255                       | 843.5                      | RBD     |
| 719-7  | IGHV3-23 | CAKVAARDGYNSDYW          | IGKV3-11  | CQQRSNWPPLTF   | 744                        | 384.9                      | RBD     |
| 719-8  | IGHV3-53 | CARARKVAARHHNDAFDIW      | IGKV3-15  | CQQYNNWPPWTF   | 1039                       | 560.6                      | RBD     |
| 719-9  | IGHV7-81 | CARENLYGNASGKYLRWFDPW    | IGLV3-10  | CHSTDSSNNPRRLF |                            | no expression              |         |
| 719-10 | IGHV3-23 | CAKGREFQLLQTRKFDWFDW     | IGKV4-1   | CQQYYGTPLTF    | /                          | /                          | /       |
| 719-11 | IGHV3-33 | CARDRLRSGTTLDDYW         | IGKV3-15  | CQQYDPPPTTF    | /                          | /                          | /       |
| 719-12 | IGHV1-18 | CGRDRLRDFWSGGDYW         | IGKV1D-33 | CQQYDDLFSF     | /                          | /                          | /       |
| 719-13 | IGHV1-69 | CARGRPFERPIDIW           | IGKV3-20  | CQQYGSSPITF    | 36.66                      | 28.18                      | RBD     |
| 719-14 | IGHV1-18 | CARVVEAYCSRSCYPNDYW      | IGKV3-15  | CQFDENWPPEYTF  | 0.08                       | 0.05                       | RBD     |
| 719-15 | IGHV4-4  | CAREVGVVAGLYFDYW         | IGLV3-21  | CHVWDTSSDRVF   | 1119                       | 667.4                      | RBD     |
| 719-16 | IGHV4-39 | CARVQLTSGGRRGHFGPW       | IGKV4-1   | CQQFYSSPLTL    | 732.1                      | 630.3                      | RBD     |
| 719-17 | IGHV4-38 | CARGSYINSWSRSEFEYW       | IGLV2-14  | CSSYTSTTRVF    | 732.1                      | 630.3                      | RBD     |
| 719-18 | IGHV3-23 | CAKGRGSPNHYDHW           | IGLV1-40  | CQSYDNLKAWVF   | 630.8                      | 487.1                      | RBD     |
| 719-19 | IGHV3-23 | CAKDRELVAATRLFYFDSW      | IGLV2-23  | CCSYTGRSPYVF   | 0.07                       | 0.04                       | NTD     |
| 719-20 | IGHV3-23 | CAKDRLTMLRGGMDVW         | IGKV3-11  | CQQRSNWPQTF    | 701.4                      | 106.6                      | NTD     |
| 719-21 | IGHV1-24 | CGGDSVRYQFSLDSW          | IGKV3-20  | CQQYGRSPRIAF   | 22.68                      | 8.80                       | NTD     |
| 719-22 | IGHV4-34 | CARSVSLPRGGVNLW          | IGKV3-15  | CQQYHNWPQTF    | 1087                       | 266                        | NTD     |
| 719-23 | IGHV3-30 | CARSGHSGGRRGPFIAIW       | IGKV1-39  | CQQSYGTPYTF    | 32.87                      | 15.73                      | RBD     |
| 719-24 | IGHV3-30 | CAKVSGGGRSLDYW           | IGKV2-28  | CMQALQIPWTF    | 49.41                      | 18.94                      | NTD     |
| 719-25 | IGHV3-23 | CARGDRLQVQRSLYSLDYW      | IGLV3-19  | CSSWDRSSNHPVF  | 30.40                      | 14.05                      | RBD     |
| 719-27 | IGHV4-39 | CAGDKFSRIDASDYFDPW       | IGLV3-9   | CQVWATTTERVF   | 1547                       | 243.1                      | NTD     |
| 719-28 | IGHV1-46 | CARSGAYYYGSGRRASAGAEYFQH | IGKV1-8   | CQQYYSYPPTF    | 15.99                      | 7.13                       | RBD     |
| 719-29 | IGHV1-18 | CAREDQYGGGRTGYYYGMDVW    | IGKV1-8   | CQQATSFPHTF    | 22.11                      | 10.37                      | NTD     |
| 719-30 | IGHV4-39 | CARQWGSRRGAWYFDYW        | IGKV1-17  | CLQHNSFPLTF    |                            | no expression              |         |
| 719-31 | IGHV3-43 | CARDSGSGGRSYFDSW         | IGKV3-20  | CLHYGSSSYTF    | /                          | /                          | /       |
| 719-32 | IGHV3-73 | CSRVPPDDDFWSGGGRFDPW     | IGLV6-57  | CQSFSTRLYVF    | /                          | /                          | /       |
| 719-33 | IGHV1-2  | CARRKISGGGRALDTW         | IGKV3-20  | CQQYGSSLTF     | /                          | /                          | /       |
| 719-34 | IGHV2-5  | CARLYYYDSSGGGRYDFW       | IGLV3-1   | CLAWDGGSTAVF   |                            | no expression              |         |
| 719-35 | IGHV4-30 | CARVDMARATRFDVW          | IGLV3-21  | CQVWDGNNAVVVF  | /                          | /                          | /       |
| 719-36 | IGHV3-7  | CATLDVDMARLALGALVW       | IGKV2-28  | CMQSIDTRTF     | 34.27                      | 17.90                      | RBD     |
| 719-37 | IGHV2-5  | CAHMRSHSVVVIKTDKWFDPW    | IGLV3-25  | CQSGDSSGTVF    | 1.73                       | 0.09                       | RBD     |
| 719-38 | IGHV3-9  | CAKDRESSGYPRFDYW         | IGLV6-57  | CQSYDTDNPWVF   | /                          | /                          | /       |
| 719-39 | IGHV3-23 | CARDRELTAATRLFYFDDW      | IGLV2-23  | CCSYATRSPYVF   | 0.06                       | 0.04                       | NTD     |
| 719-40 | IGHV3-33 | CAREGSGTYNPTISPDYW       | IGKV2-30  | CMQGHHPWTF     | 4.11                       | 0.29                       | RBD     |
| 719-41 | IGHV3-7  | CARTYYFDKTSPLDQW         | IGKV1-39  | CHQSYGALTWTF   | /                          | /                          | /       |

|        |          |                           |          |              |       |       |     |
|--------|----------|---------------------------|----------|--------------|-------|-------|-----|
| 719-42 | IGHV3-13 | CARVVHVSPRRGNIYSYMDMW     | IGKV1-39 | CQQTYSNPGSTF | 0.93  | 0.32  | RBD |
| 719-43 | IGHV4-59 | CGRDLSELHGLYFHTDVW        | IGKV3-11 | CQQRHSWPSF   | /     | /     | /   |
| 719-44 | IGHV3-53 | CARGVGEAASGTPGTRWFDPW     | IGKV1-12 | CQQSNGFPRTF  | /     | /     | /   |
| 719-45 | IGHV1-3  | CARGNVGDSFDYW             | IGKV4-1  | CQQYYSLPLTF  | /     | /     | /   |
| 719-46 | IGHV4-4  | CARDKARGIYYGSGSFSYYYGMDVW | IGKV3-20 | CQYQSSPLTF   | 19.09 | 13.65 | RBD |

The symbol "/" indicated a positive OD value at the highest concentration.

76

77

78

79

80

81

82

83

84

85

86

87

88

89

90

91

92

93

94

95 **Supplementary Table S6. Demographics and vaccine regimens of eight donors used for**  
 96 **cytokine and chemokine profiling in nasal washes.**

| Donor ID | Age (year) | Gender (F/M) | Doses of                                           | Doses of           | Interval between                                   | Previous                    |
|----------|------------|--------------|----------------------------------------------------|--------------------|----------------------------------------------------|-----------------------------|
|          |            |              | intramuscular vaccination with inactivated vaccine | intranasal vaccine | inactivated vaccine and intranasal vaccine (month) | SARS-CoV-2 infection status |
| 1        | 60         | M            | 2                                                  | 1                  | 7                                                  | Uninfected                  |
| 2        | 41         | M            | 2                                                  | 1                  | 7                                                  | Uninfected                  |
| 3        | 27         | F            | 2                                                  | 1                  | 11                                                 | Uninfected                  |
| 4        | 40         | M            | 2                                                  | 1                  | 8                                                  | Uninfected                  |
| 5        | 26         | M            | 2                                                  | 1                  | 11                                                 | Uninfected                  |
| 6        | 42         | M            | 2                                                  | 1                  | 14                                                 | Uninfected                  |
| 7        | 35         | F            | 2                                                  | 1                  | 10                                                 | Uninfected                  |
| 8        | 32         | M            | 2                                                  | 1                  | 7                                                  | Uninfected                  |

97  
 98  
 99  
 100  
 101  
 102  
 103  
 104  
 105  
 106  
 107  
 108  
 109  
 110  
 111  
 112  
 113  
 114  
 115  
 116  
 117  
 118  
 119  
 120  
 121  
 122  
 123  
 124

125 **Supplementary Table S7. Yield of purified nasal sIgA, serum IgG, and serum IgA from**  
 126 **six donors.**

| Donor ID | Nasal        | Purified     |                          | Serum<br>(mL) | Purified IgA<br>(mg) | Purified IgA<br>(mg/mL) | Purified IgG<br>(mg) | Purified IgG<br>(mg/mL) |
|----------|--------------|--------------|--------------------------|---------------|----------------------|-------------------------|----------------------|-------------------------|
|          | wash<br>(mL) | sIgA<br>(µg) | Purified sIgA<br>(µg/mL) |               |                      |                         |                      |                         |
| Donor 1  | 200          | 311.75       | 1.56                     | 5.00          | 3.16                 | 0.63                    | 66.26                | 13.25                   |
| Donor 2  | 200          | 335.50       | 1.68                     | 5.00          | 4.33                 | 0.87                    | 42.41                | 8.48                    |
| Donor 3  | 200          | 260.25       | 1.30                     | 5.00          | 2.98                 | 0.60                    | 42.15                | 8.43                    |
| Donor 4  | 300          | 239.28       | 0.80                     | 4.00          | 3.12                 | 0.78                    | 26.11                | 6.53                    |
| Donor 5  | 300          | 440.70       | 1.47                     | 4.00          | 3.94                 | 0.98                    | 30.88                | 7.72                    |
| Donor 6  | 300          | 404.16       | 1.35                     | 4.00          | 2.68                 | 0.67                    | 41.54                | 10.39                   |
| Mean±SD  |              |              | 1.36±0.31                |               |                      | 0.75±0.15               |                      | 9.13±2.38               |

127  
 128  
 129
